# Supplementary material
Source: PubMed Central journal article supplement (PMC3204034)

# Supplemental data

Fig 1A

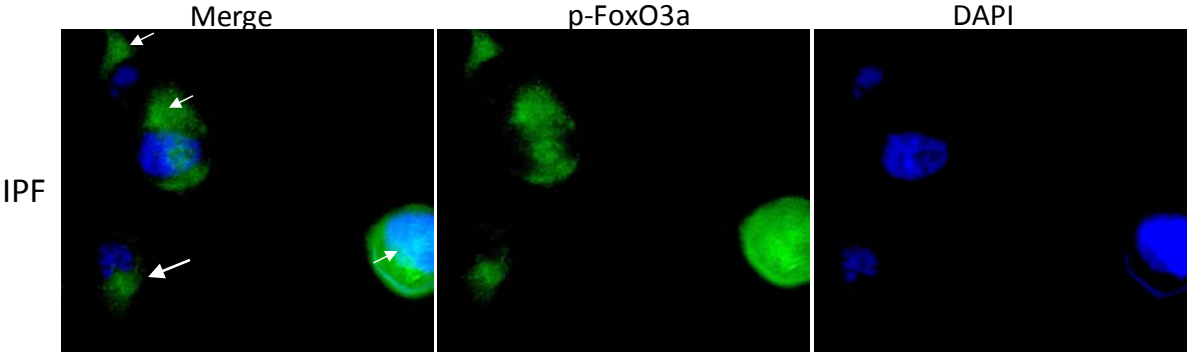

Fig 1B

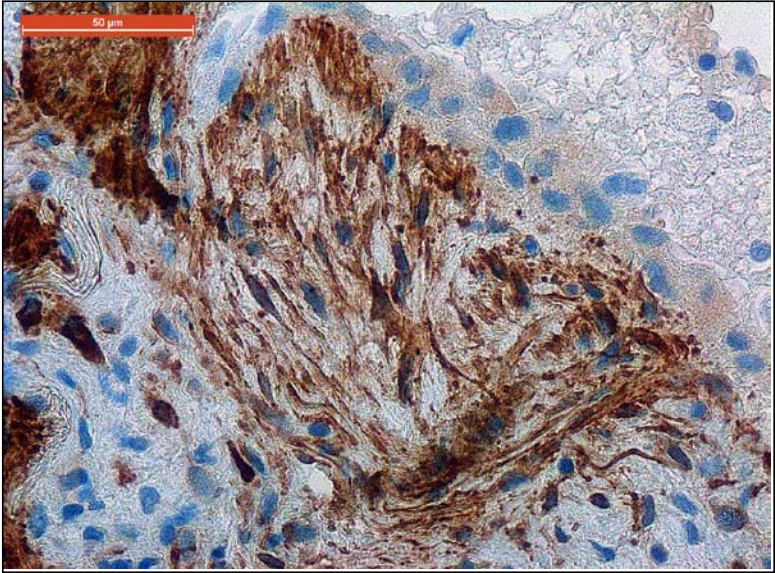

Supplement: mmc1.pdf [file mmc1.pdf]
